# Supplementary material
Source: PubMed Central journal article supplement (PMC3131467)
Supplement: NIHMS297176-supplement-1.pdf [file NIHMS297176-supplement-1.pdf]

# Supplementary Figure.1

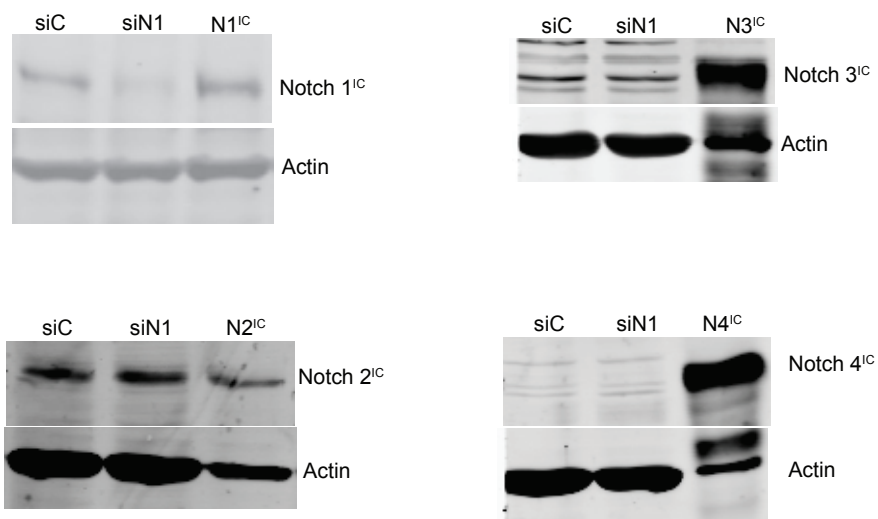

## Supplementary Figure.2

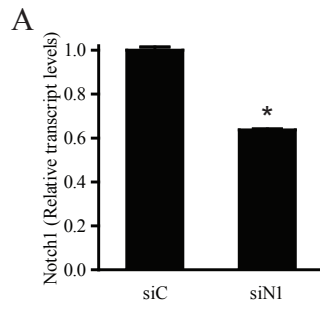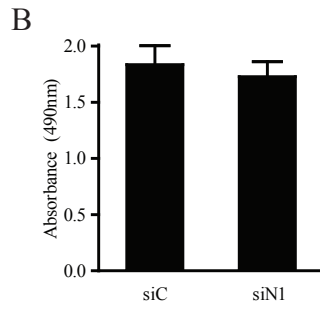

Supplementary Figure.3

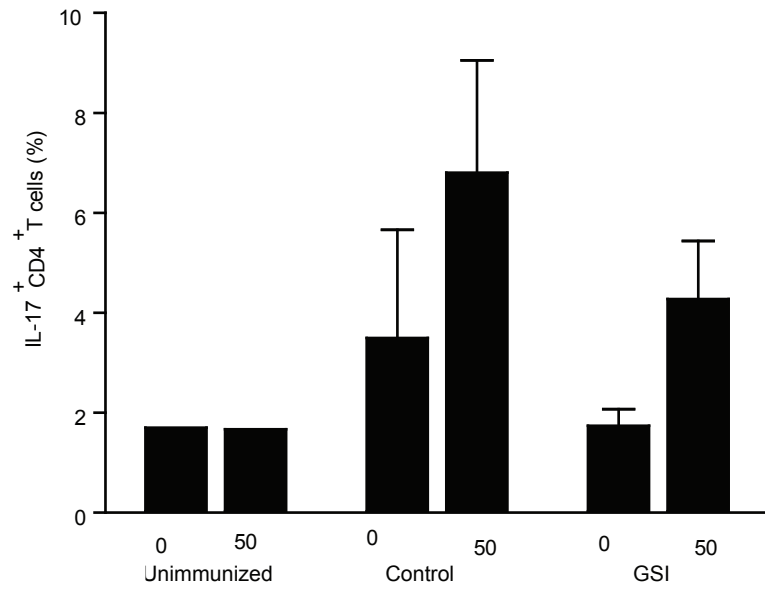

**Supplementary Data Figure legends:**

**Supplementary Fig.1:** Western blot of Notch1<sup>IC</sup>, Notch2<sup>IC</sup>, Notch3<sup>IC</sup> and Notch4<sup>IC</sup> after nucleoporation of Notch1 siRNA in naïve CD4<sup>+</sup> T cells followed by Th17 differentiation. 293T cells transfected with Notch1<sup>IC</sup>, Notch2<sup>IC</sup>, Notch3<sup>IC</sup> and Notch4<sup>IC</sup> constructs were used as a positive control.

**Supplementary Fig.2:** (A) Quantitative RT-PCR using Notch1 specific primers to assess Notch1 transcript levels. (B) Cells were assayed for viability after nucleoporation using Cell titer 96 Aqueous One solution cell proliferation assay. Data depicted here is absorbance of formazan product measured at 490nm using ELISA plate reader.

**Supplementary Fig.3:** Intracellular staining of IL-17A *in-vivo* in un-immunized, GSI fed or control chow fed mice. Data depicted here is percentage of IL-17<sup>+</sup> cells gated in CD4<sup>+</sup> T cells.
